# Supplementary material for: Purification, characterization and bioactivities of polysaccharides from Pleurotus ferulae
Source: Royal Society of Chemistry journal article supplement (doi:10.1039/c7fo00227k), 2017-01-01
Supplement: c7fo00227k1.pdf [file c7fo00227k1.pdf]

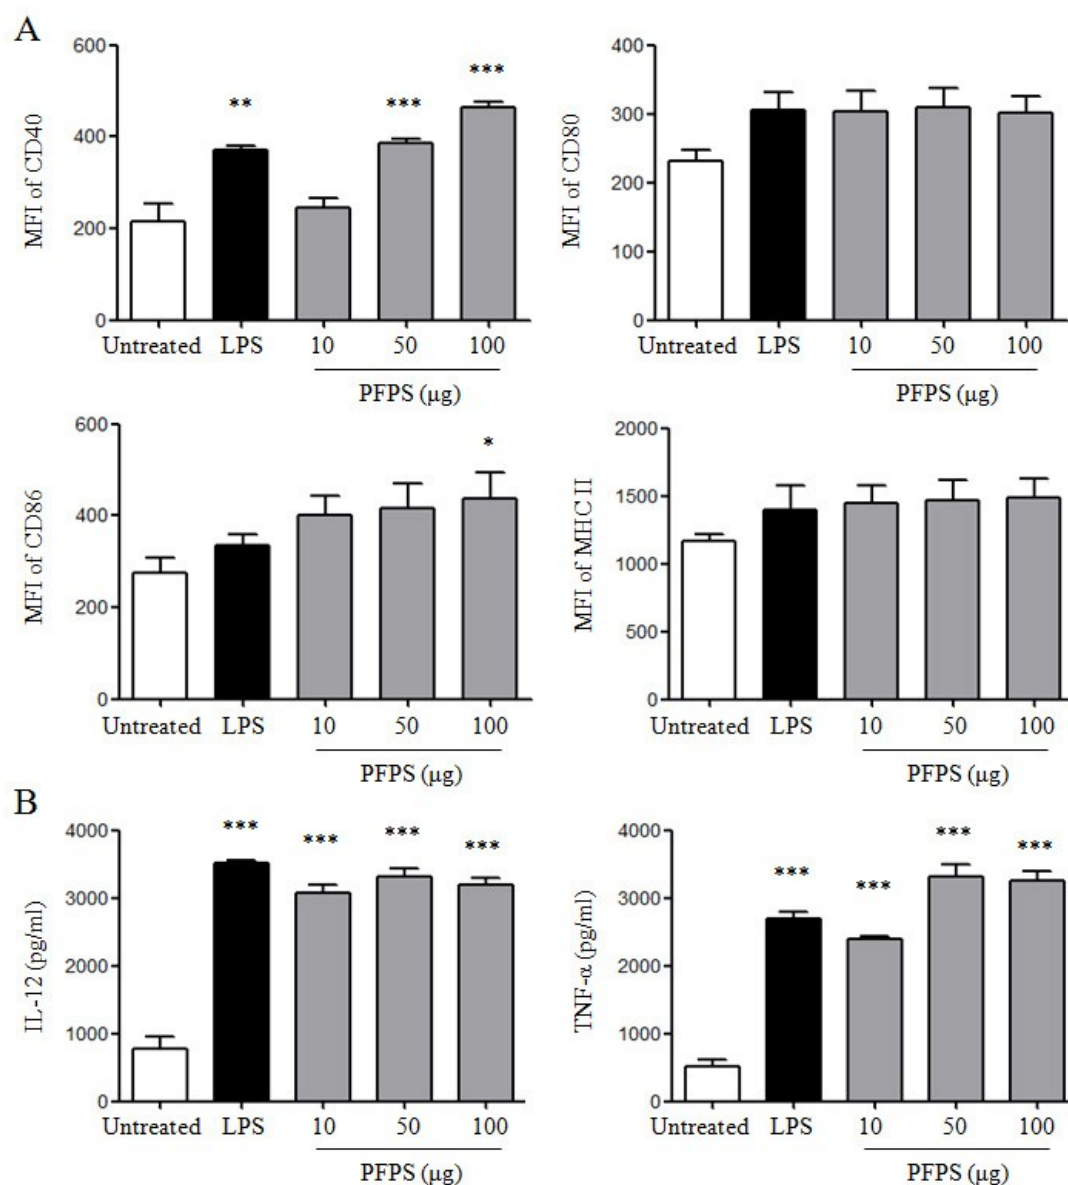

**Supplemental Figure 1. The effect of PFPS on DC maturation and cytokine production.**

Immature DCs were induced from bone marrow cells of C57BL/6 in the presence of GM-CSF. On day 7, cells were collected and treated with 10, 50 and 100  $\mu$ g/ml of PFPS or 20 ng/ml of LPS for 12 h. (A) The expressions of CD40, CD80, CD86 and MHC II were detected by flow cytometry. Mean fluorescence intensity (MFI) is shown. (B) The secretions of IL-12 and TNF- $\alpha$  in the supernatants of the above samples were detected by ELISA. Data are from 4 independent experiments. \*  $P < 0.05$ , \*\*  $P < 0.01$  and \*\*\*  $P < 0.001$  (ANOVA) compared to untreated DCs.
